# Supplementary material for: Irradiation induces p53 loss of heterozygosity in breast cancer expressing mutant p53
Source: PubMed Central journal article supplement (PMC6881331; doi:10.1038/s42003-019-0669-y), 2019-11-27
Supplement: 42003_2019_669_MOESM1_ESM.pdf [file 42003_2019_669_MOESM1_ESM.pdf]

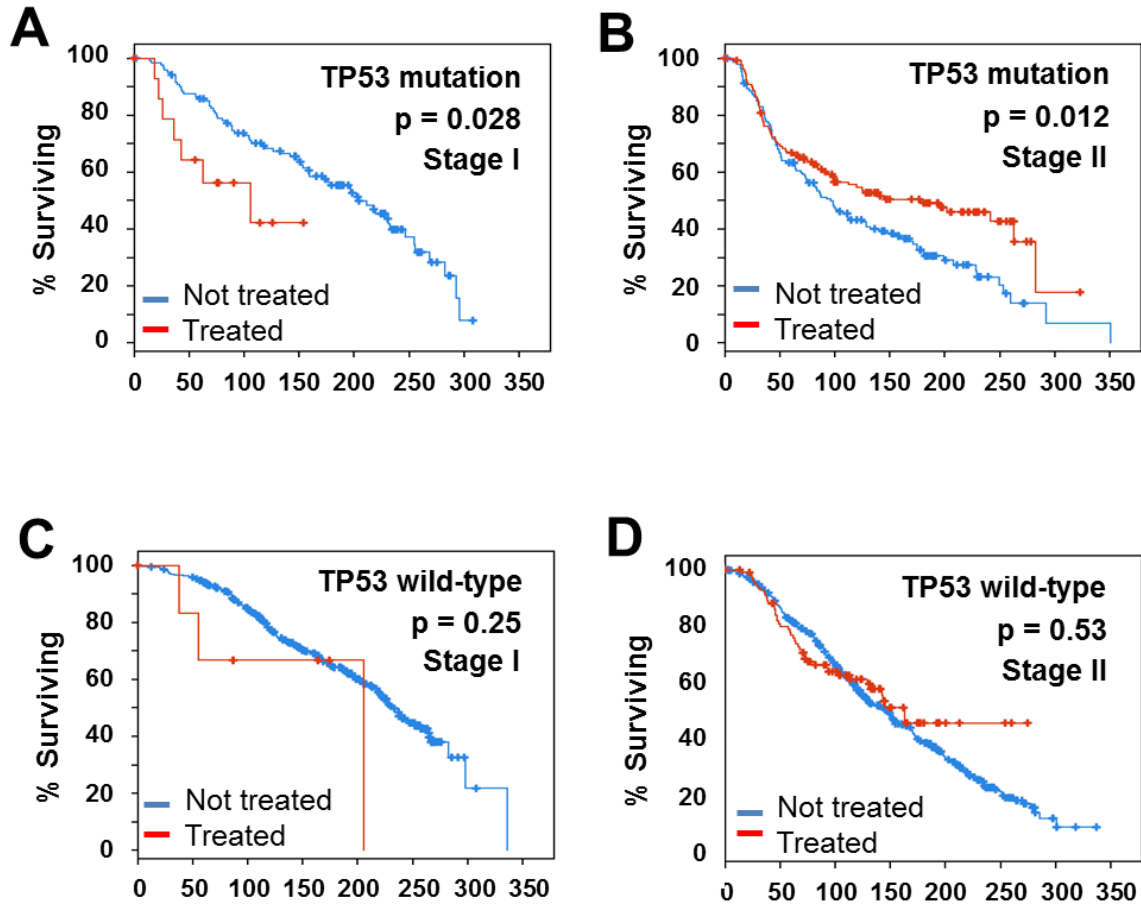

**Supplementary Figure 1. The survival of mutp53 breast cancer patients following chemotherapy is stage dependent.**

Kaplan-Meier survival curve for patients with breast cancer receiving chemotherapy (red line) or untreated (blue line) according to the stage and TP53 mutation status. **(A)** p53 mutant, stage I; **(B)** p53 mutant, stage II; **(C)** wtp53 stage I; **(D)** wtp53 stage II.

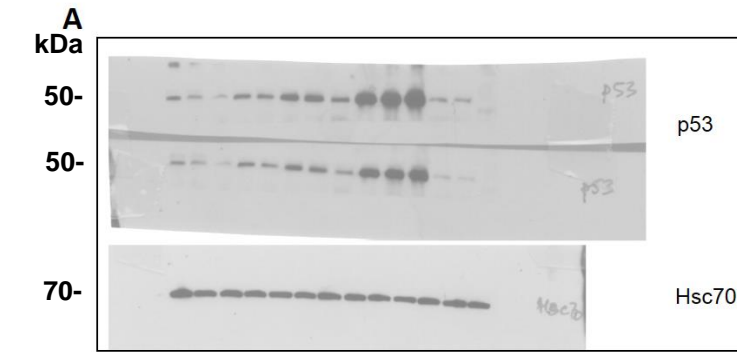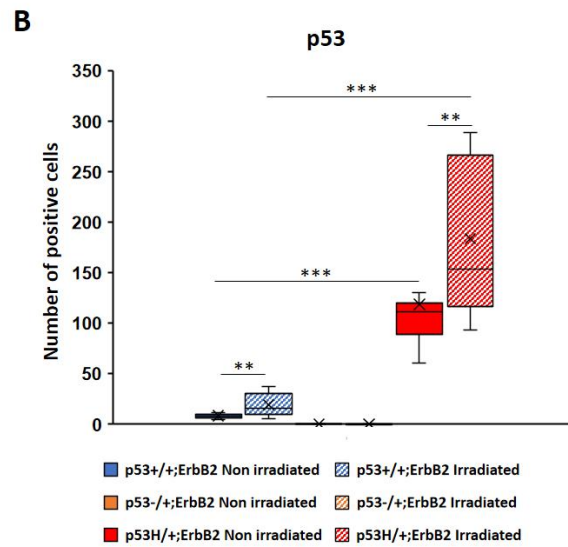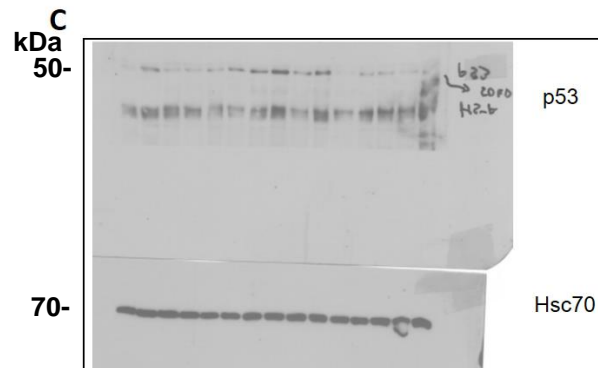

**Supplementary Figure 2. Quantification of IHC staining and western blots shown in full.**

(A) Western blot from Fig. 2D. (B) Quantification of the number of p53-positive cells in ErbB2 mouse mammary tumors. (C) Western blot from Fig. 3C. \*= $p \leq 0.05$ ; \*\*= $p \leq 0.01$ ; \*\*\*= $p < 0.001$ ,  $\pm$ SE.

**A**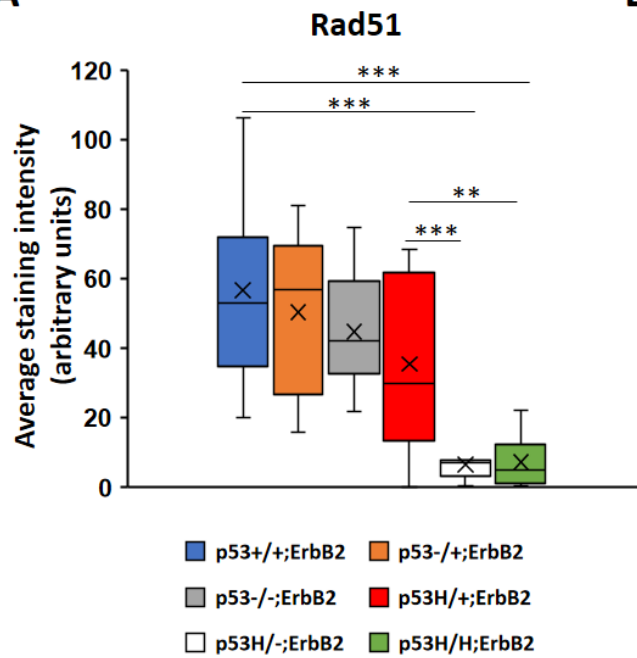**B**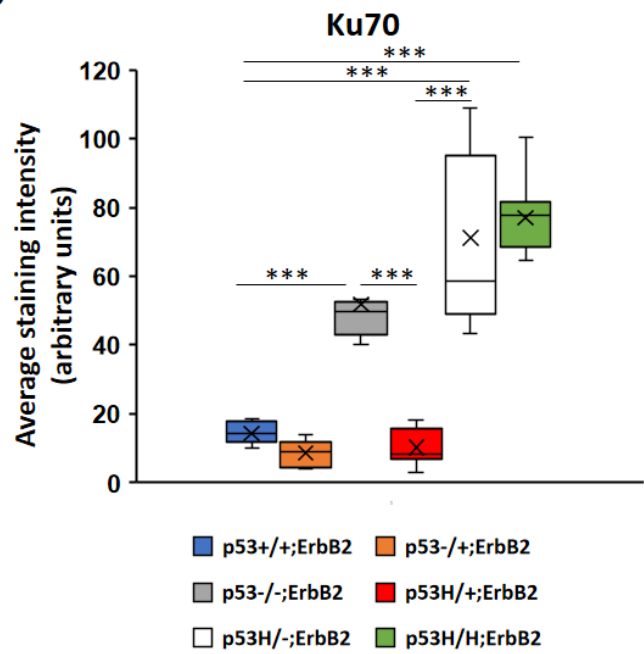

### Supplementary Figure 3. Quantification of IHC staining.

**(A)** Quantification of staining intensity of Rad51 in ErbB2 mouse mammary tumors. **(B)** Quantification of staining intensity of Ku70 in ErbB2 mouse mammary tumors. \*= $p \leq 0.05$ ; \*\*= $p \leq 0.01$ ; \*\*\*= $p < 0.001$ ,  $\pm$ SE.

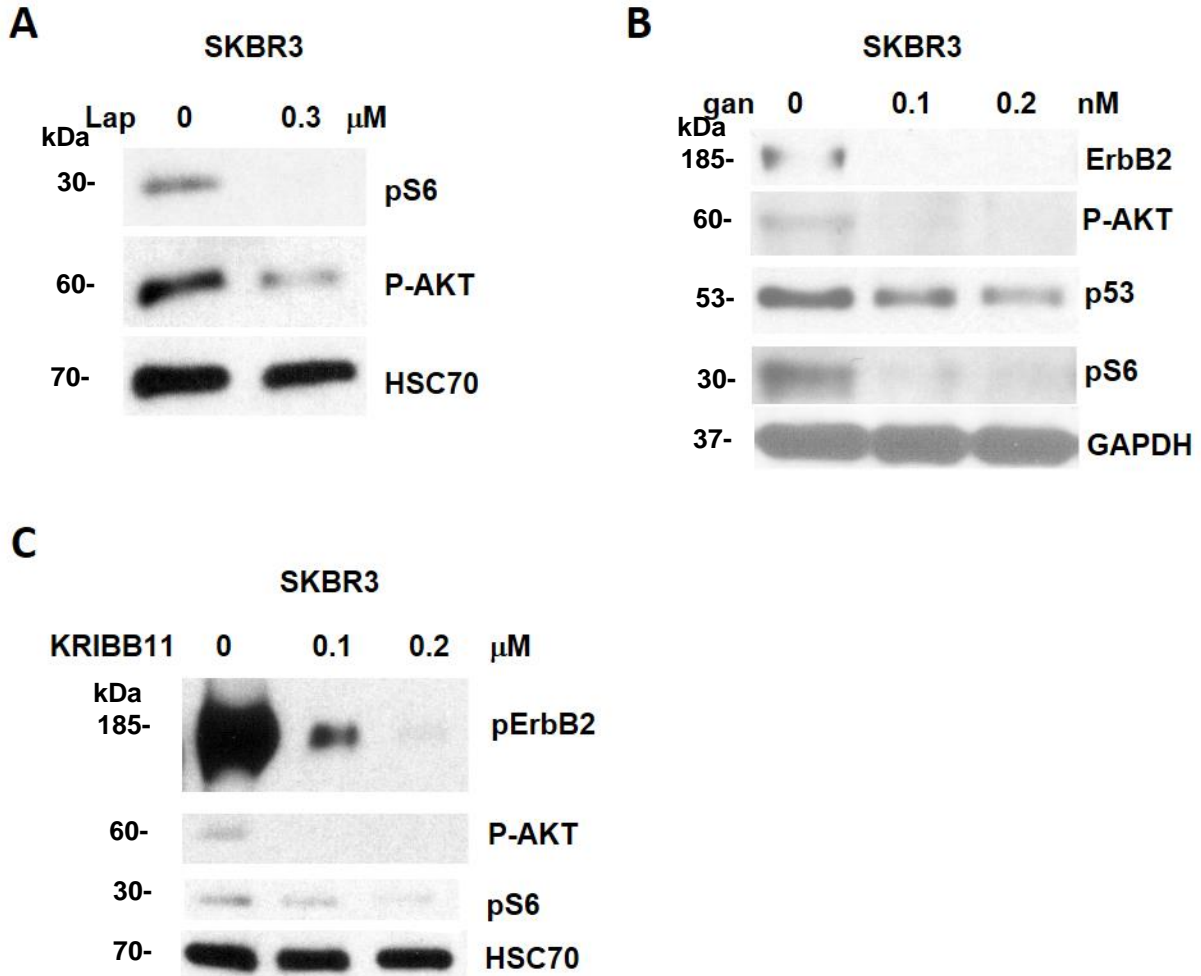

**Supplementary Figure 4. Inhibition of mTOR pathway in SKBR3 cell line.**

(A) ErbB2 inhibition by lapatinib inhibits mTOR (pS6) in human mutp53 (SKBR3) cells. Hsp90 inhibition by ganetespib (B) and HSF1 inhibition by KRIBB11 (C) suppresses mTOR in mutp53 human SKBR3 cells. Western blot after 24h treatment with indicated concentrations. HSC70 or GAPDH as a loading control.

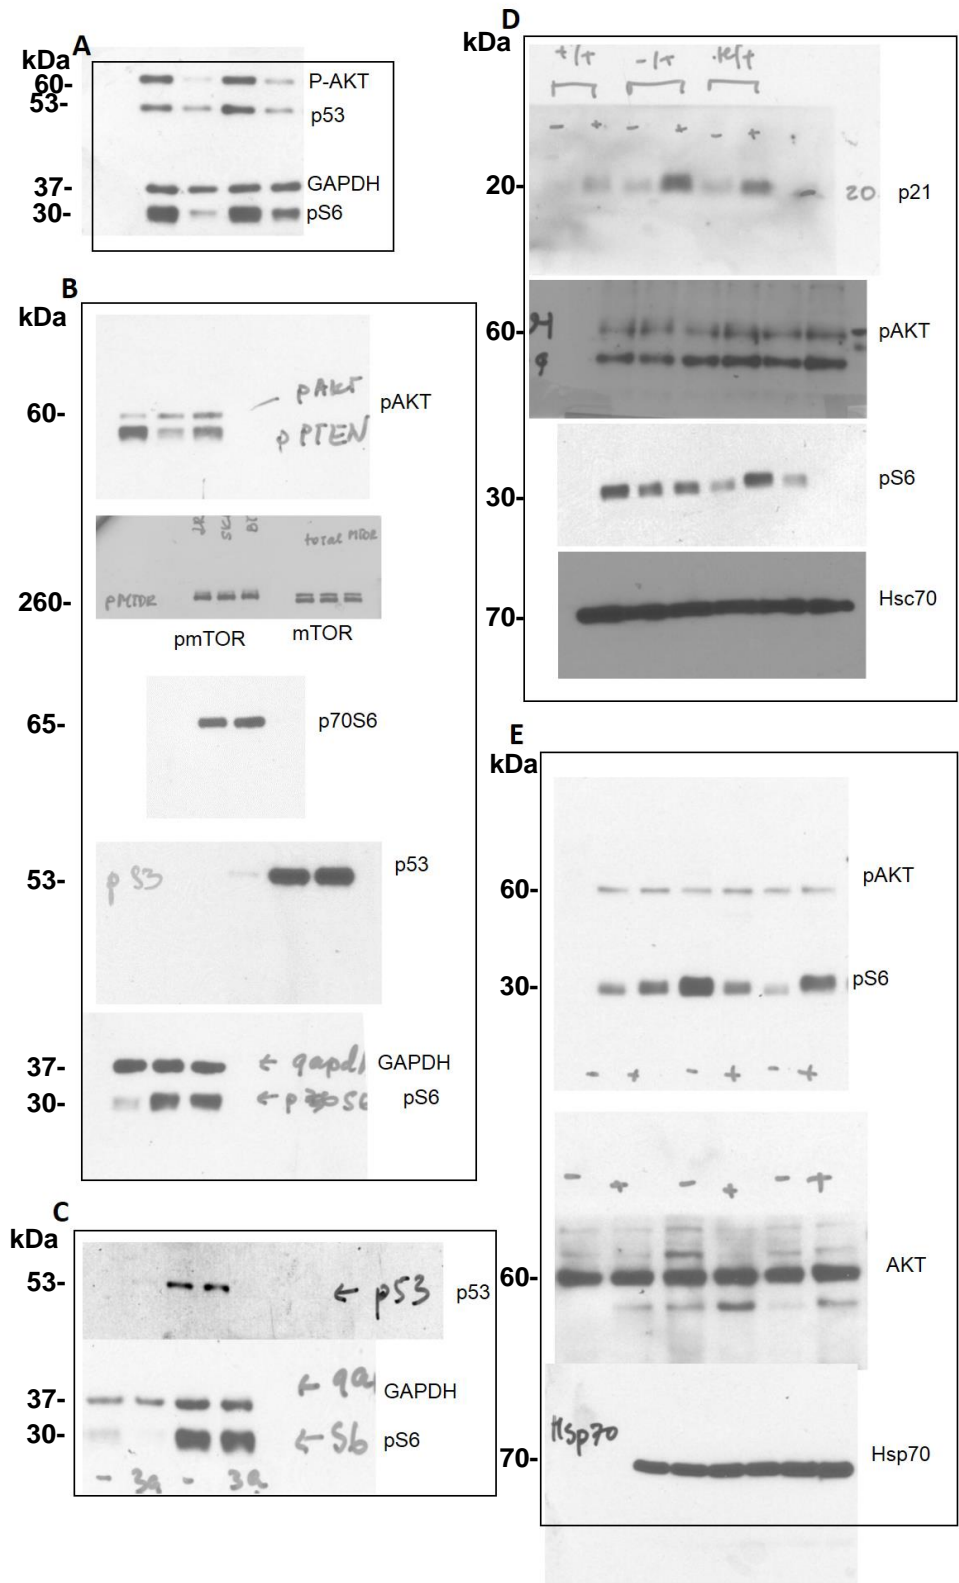

**Supplementary Figure 5. Western blots shown in full.**

**(A)** Western blot from Fig. 5A. **(B)** Western blot from Fig. 5B. **(C)** Western blot from Fig. 5C. **(D)** Western blot from Fig. 5F. **(E)** Western blot from Fig. 5G.

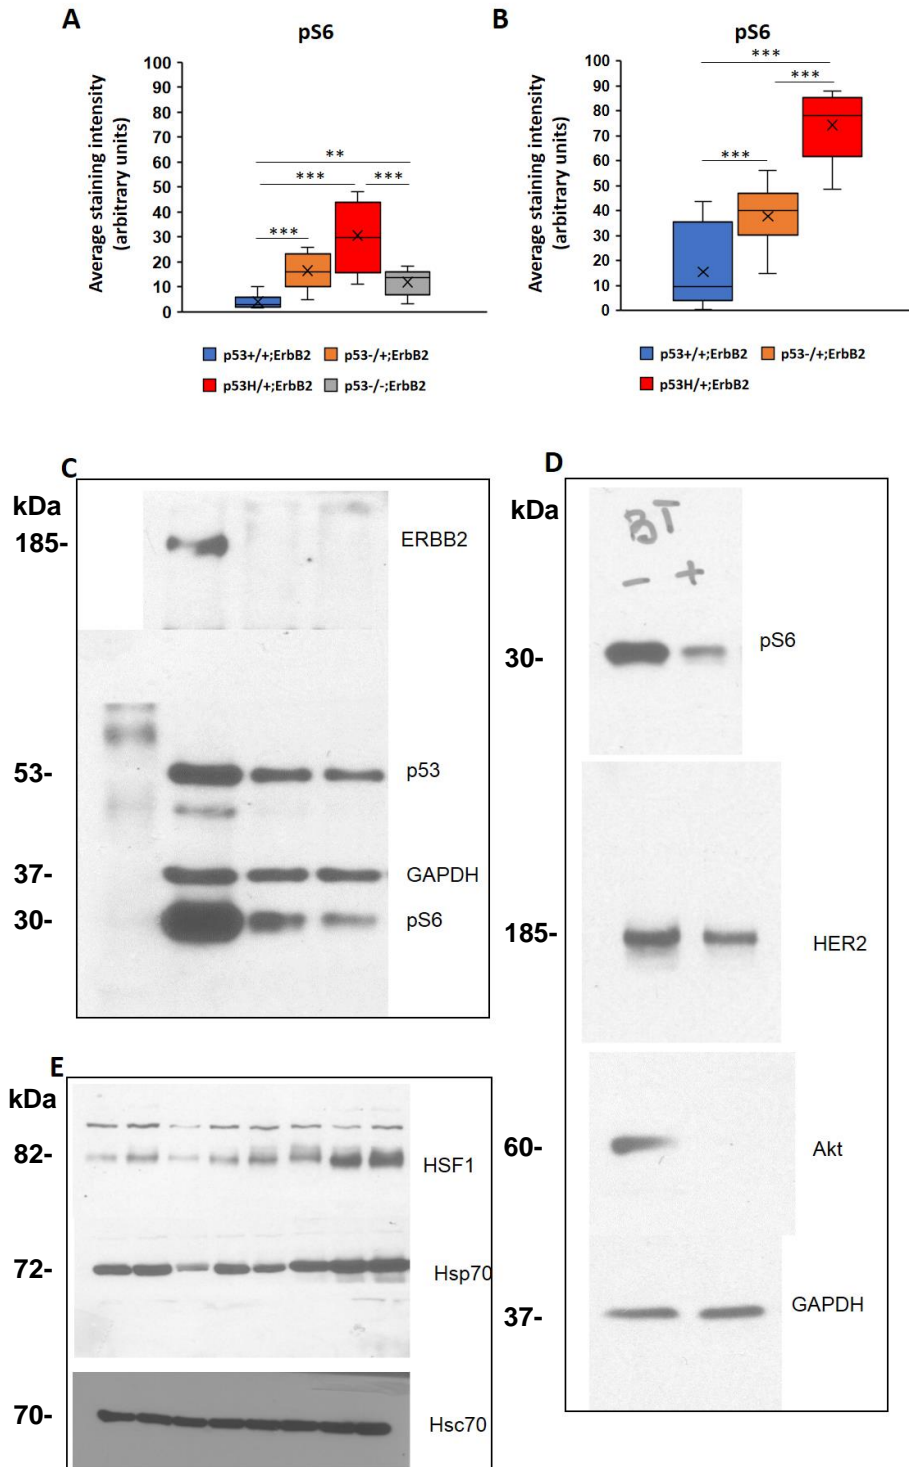

**Supplementary Figure 6. Quantification of IHC staining and western blots shown in full.**

**(A)** Quantification of staining intensity of pS6 in non-irradiated ErbB2 mouse mammary tumors. **(B)** Quantification of staining intensity of pS6 in irradiated ErbB2 mouse mammary tumors. **(C)** Western blot from Fig. 5I. **(D)** Western blot from Fig. 5J. **(E)** Western blot from Fig. 5K. \*= $p \leq 0.05$ ; \*\*= $p \leq 0.01$ ; \*\*\*= $p < 0.001$ ,  $\pm$ SE.

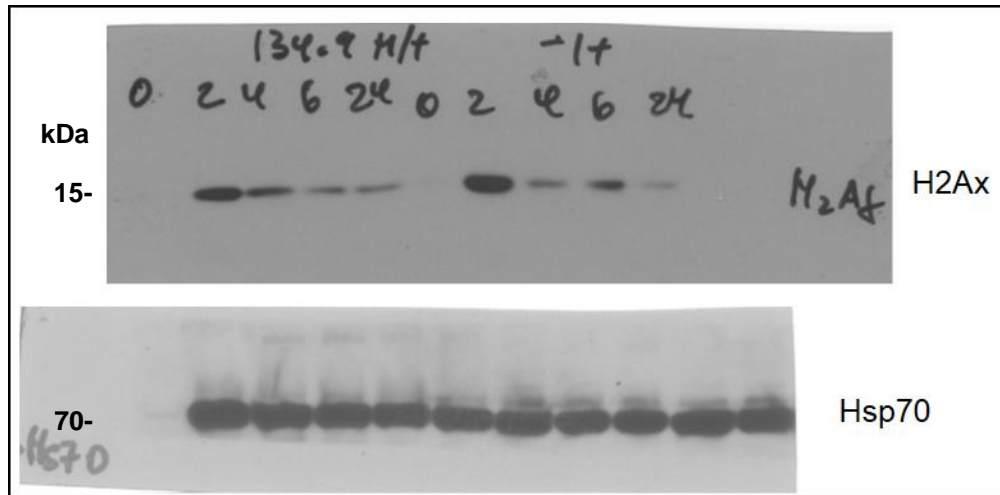

**Supplementary Figure 7. Western blots shown in full.**

**(A)** Western blot from Fig. 6B.
